# Supplementary material for: Modulating the surface segregation of PdCuRu nanocrystals for enhanced all-pH hydrogen evolution electrocatalysis
Source: Royal Society of Chemistry journal article supplement (doi:10.1039/c9ta06861a), 2019-01-01
Supplement: c9ta06861a1.pdf [file c9ta06861a1.pdf]

## Supporting information

# Modulating surface segregation of PdCuRu nanocrystals for enhanced all-pH hydrogen evolution electrocatalysis

Menggang Li,<sup>ab#</sup> Mingchuan Luo,<sup>b#</sup> Zhonghong Xia,<sup>b</sup> Yong Yang,<sup>b</sup> Yarong Huang,<sup>a</sup> Dong Wu,<sup>b</sup> Yingjun Sun,<sup>b</sup> Chunji Li,<sup>b</sup> Yuguang Chao,<sup>b</sup> Wenxiu Yang,<sup>b</sup> Weiwei Yang,<sup>a\*</sup> Yongsheng Yu,<sup>a\*</sup> and Shaojun Guo<sup>bc\*</sup>

<sup>a</sup> MIT Key Laboratory of Critical Materials Technology for New Energy Conversion and Storage, School of Chemistry and Chemical Engineering, Harbin Institute of Technology, Harbin, Heilongjiang 150001, China. E-mail: yangww@hit.edu.cn, ysyu@hit.edu.cn

<sup>b</sup> Department of Materials Science & Engineering, College of Engineering, Peking University, Beijing 100871, China. E-mail: guosj@pku.edu.cn

<sup>c</sup> BIC-ESAT, College of Engineering, Peking University, Beijing 100871, China

# These authors contributed equally to this work.

## Experimental section

**Chemicals.** Palladium (II) acetylacetonate ( $\text{Pd}(\text{acac})_2$ , 99%) was purchased from Sigma-Aldrich. Copper (II) acetylacetonate ( $\text{Cu}(\text{acac})_2$ , 97%), ruthenium (III) acetylacetonate ( $\text{Ru}(\text{acac})_3$ , 97%), commercial Pt/C (20 wt.%), commercial/C (10 wt.%), and Nafion (5 wt.%) were all obtained from Alfa Aesar. L-ascorbic acid (AA, AR.) and isopropyl alcohol were supplied by J&K Scientific. Iron (III) chloride hexahydrate ( $\text{FeCl}_3 \cdot 6\text{H}_2\text{O}$ , AR.), potassium dihydrogen phosphate ( $\text{KH}_2\text{PO}_4$ , AR.), dipotassium hydrogen phosphate trihydrate ( $\text{K}_2\text{HPO}_4 \cdot 3\text{H}_2\text{O}$ , AR.) and perchloric acid ( $\text{HClO}_4$ , GR., 70%-72%) were all bought from Sinopharm Chemical Reagent Co. Ltd. Potassium hydroxide (KOH, GR., 95%) and acetic acid (36%) were obtained from Aladdin. Ethanol and cyclohexane were provided by Beijing Tongguang Fine Chemicals Company. All the reagents and chemicals were used as received without purification. Besides, the ultrapure water ( $18.2 \text{ M}\Omega \text{ cm}^{-1}$ ) used in all experiments was prepared by passing through an ultra-pure purification system.

**Synthesis of PdCuRu nanocrystals.** In a typical synthesis of  $\text{Pd}_{45}\text{Cu}_{39}\text{Ru}_{16}$  nanocrystals,  $\text{Pd}(\text{acac})_2$  (0.025 mmol),  $\text{Cu}(\text{acac})_2$  (0.05 mmol),  $\text{Ru}(\text{acac})_3$  (0.0175 mmol),  $\text{FeCl}_3 \cdot 6\text{H}_2\text{O}$  (0.02 mmol), AA (0.2 mmol), and OAm (5 mL) were put in a sealed vial (volume: 20 mL). The mixture was ultrasonicated for 1.0 h to obtain a transparent solution. The vial was then transferred into an oil bath at a temperature of 180 °C, and maintained this temperature for 12 h before being cooling down to room temperature. The resulting black colloidal products were collected by centrifugation with an ethanol/cyclohexane mixture, and then dispersed in 8 mL cyclohexane for further use.  $\text{Pd}_{50}\text{Cu}_{50}$  nanocrystals were obtained by using the similar procedure except for the absence of Ru precursors. PdCuRu nanocrystals with different compositions could be prepared by changing the amount of  $\text{Ru}(\text{acac})_3$  to 0.006 mmol, 0.0125 mmol, 0.025 mmol, and 0.05 mmol, respectively, and keep the other reaction conditions unchanged.

**Preparation of PdCuRu/C.** The obtained nanocrystals dispersed in cyclohexane (8 mL) and Ketjen Black-300 J carbon supports (15 mg) dispersed in ethanol (50 mL) were mixed under sonication for 3 h, and then the black products were collected by centrifugation. The remained organic impurities on nanocrystals were removed by being subject to heating at 60 °C in acetic acid (36%) for 2 h under N<sub>2</sub> atmosphere. The products were separated by centrifugation and washed with ethanol for several times and dried at 60 °C for the next step.

**Preparation of Pd<sub>45</sub>Cu<sub>39</sub>Ru<sub>16</sub>/C-350, Pd<sub>45</sub>Cu<sub>39</sub>Ru<sub>16</sub>/C-400, Pd<sub>45</sub>Cu<sub>39</sub>Ru<sub>16</sub>/C-450, Pd<sub>45</sub>Cu<sub>39</sub>Ru<sub>16</sub>/C-500.** The as-prepared Pd<sub>45</sub>Cu<sub>39</sub>Ru<sub>16</sub>/C was annealed at 350 °C, 400 °C, 450 °C, and 500 °C under a 5% H<sub>2</sub>/95% Ar for 1 h with a heating rate of 5 °C min<sup>-1</sup>, respectively. The final samples were denoted as Pd<sub>45</sub>Cu<sub>39</sub>Ru<sub>16</sub>/C-350, Pd<sub>45</sub>Cu<sub>39</sub>Ru<sub>16</sub>/C-400, Pd<sub>45</sub>Cu<sub>39</sub>Ru<sub>16</sub>/C-450, and Pd<sub>45</sub>Cu<sub>39</sub>Ru<sub>16</sub>/C-500, respectively.

**Characterization.** Transmission electron microscopy (TEM) images were conducted on a HITACHI H-7700 transmission electron microscopy with an accelerating voltage of 100 kV and the high resolution TEM (HRTEM) images were obtained on a FEI Tecnai-G2 F30 at an accelerating voltage of 300 kV. Scanning electron microscopy-energy dispersive X-ray spectroscopy (SEM-EDS) spectra were performed on a JEOL JSM-6360 scanning electron microscope with an accelerating voltage of 200 kV. X-ray diffraction (XRD) patterns were collected on a PANalytical-XRD instrument using Cu K $\alpha$  radiation X-ray source ( $\lambda = 0.15406$  nm) at the voltage of 40 kV as well as the current of 30 mA. Inductively coupled plasma atomic emission spectrometry (ICP-AES) analysis was determined using an Agilent 8800 instrument. X-ray photoelectron spectroscopy (XPS) tests were carried out with Thermo Scientific Escalab 250Xi using a monochromated Al-K $\alpha$  (1486.5 eV) X-ray radiation.

**Electrochemical measurements.** The obtained catalysts were dispersed and sonicated in a mixture of isopropyl alcohol, ultrapure water and Nafion solution (volume ratio is 1 : 1 : 0.008) to form a homogeneous ink (1 mg mL<sup>-1</sup>). A 1 mg mL<sup>-1</sup> ink of Pt/C (JM, 20 wt.%) was prepared and a 2 mg mL<sup>-1</sup> ink of Pd/C (JM, 10 wt.%) was also prepared. Then, 10  $\mu$ L of the mixture ink was deposited on a polished glassy carbon (GC) working electrode (5 mm, 0.196 cm<sup>2</sup>) and dried at ambient conditions.

The electrochemical tests were measured in alkaline (0.1 M KOH), neutral (0.5 M PBS), and acidic (0.1 M HClO<sub>4</sub>) solutions on a CHI 660e electrochemical workstation (CH Instruments, Inc., Shanghai) with a typical three-electrode system, consisting of a GC working electrode (Pine Instruments, 5 mm of diameter), saturated calomel electrode (SCE), and carbon rod served as the working, reference and counter electrodes, respectively. Before measurements, the electrolyte was bubbling by N<sub>2</sub> for at least 30 minutes to remove residual O<sub>2</sub>. The polarization curves were tested at a scan rate of 5 mV s<sup>-1</sup>, and obtained with 95% iR compensations. All recorded related potentials were converted to the reversible hydrogen electrode (RHE).

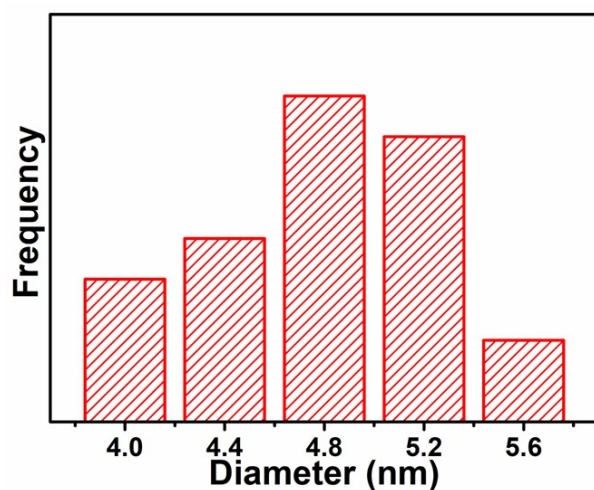

**Figure S1.** The size distribution of Pd<sub>25</sub>Cu<sub>56</sub>Ru<sub>14</sub> nanocrystals.

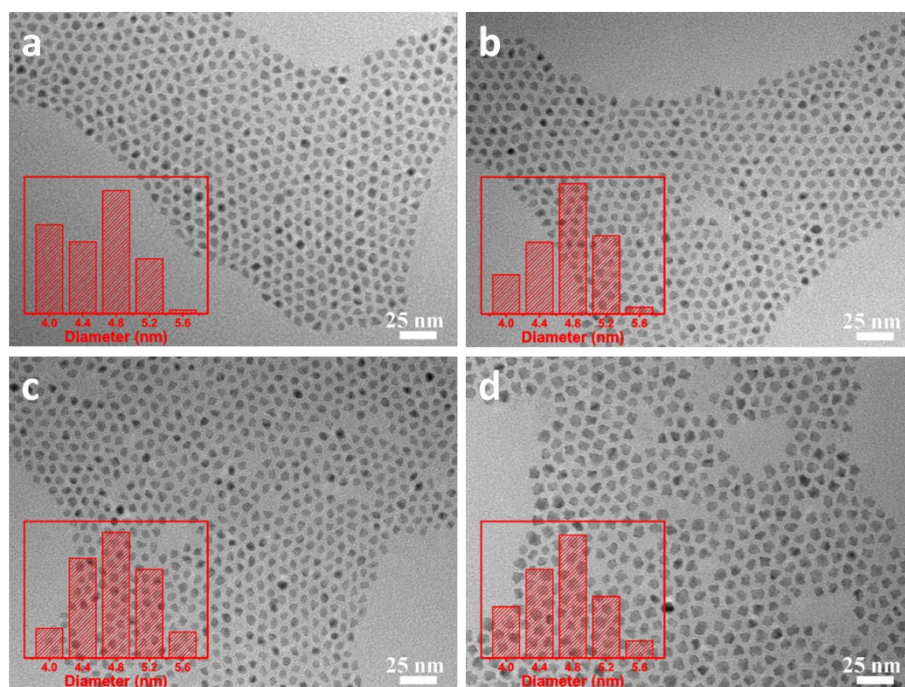

**Figure S2.** The representative TEM images of (a) Pd<sub>32</sub>Cu<sub>59</sub>Ru<sub>9</sub>, (b) Pd<sub>29</sub>Cu<sub>58</sub>Ru<sub>13</sub>, (c) Pd<sub>27</sub>Cu<sub>55</sub>Ru<sub>17</sub> and (d) Pd<sub>23</sub>Cu<sub>51</sub>Ru<sub>26</sub> nanocrystals (the *insets* are the corresponding size distributions).

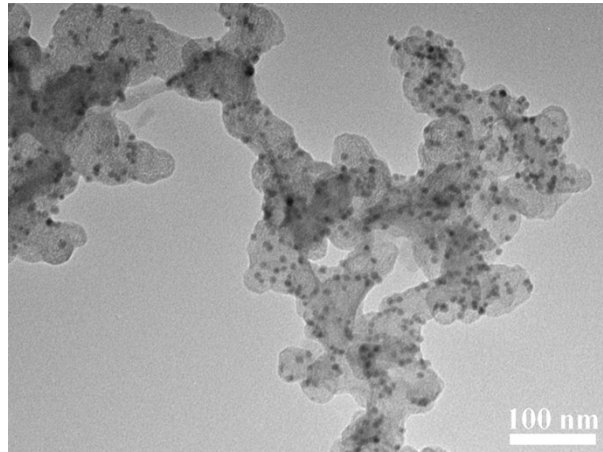

**Figure S3.** The representative TEM image of Pd<sub>45</sub>Cu<sub>39</sub>Ru<sub>16</sub>/C.

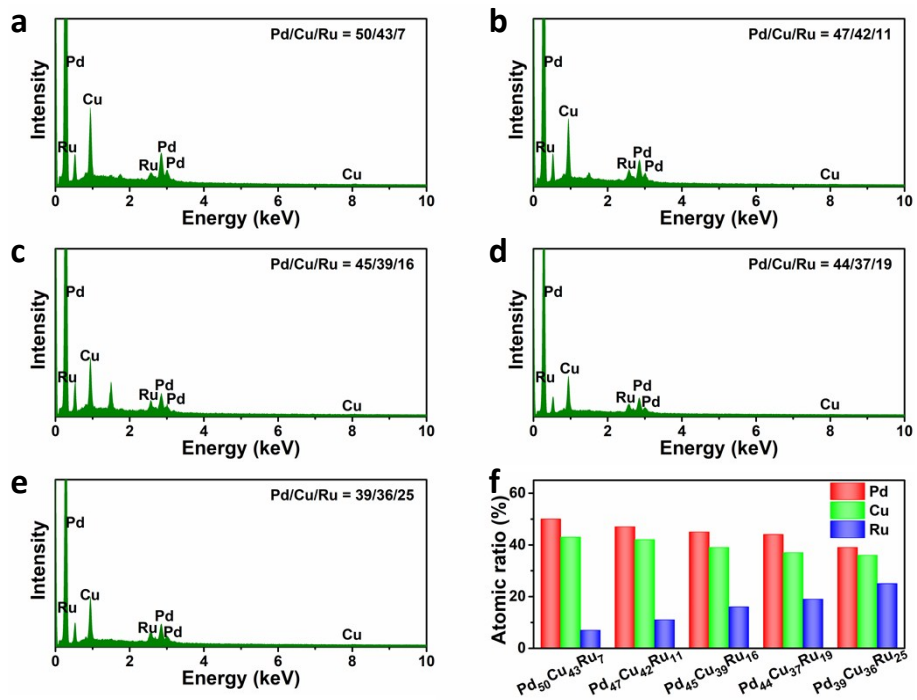

**Figure S4.** The SEM-EDS spectra of (a) Pd<sub>50</sub>Cu<sub>43</sub>Ru<sub>7</sub>/C, (b) Pd<sub>47</sub>Cu<sub>42</sub>Ru<sub>11</sub>/C, (c) Pd<sub>45</sub>Cu<sub>39</sub>Ru<sub>16</sub>/C, (d) Pd<sub>44</sub>Cu<sub>37</sub>Ru<sub>19</sub>/C and (e) Pd<sub>39</sub>Cu<sub>36</sub>Ru<sub>25</sub>/C nanocrystals. (f) The ICP-OES results of PdCuRu/C with different atomic ratios.

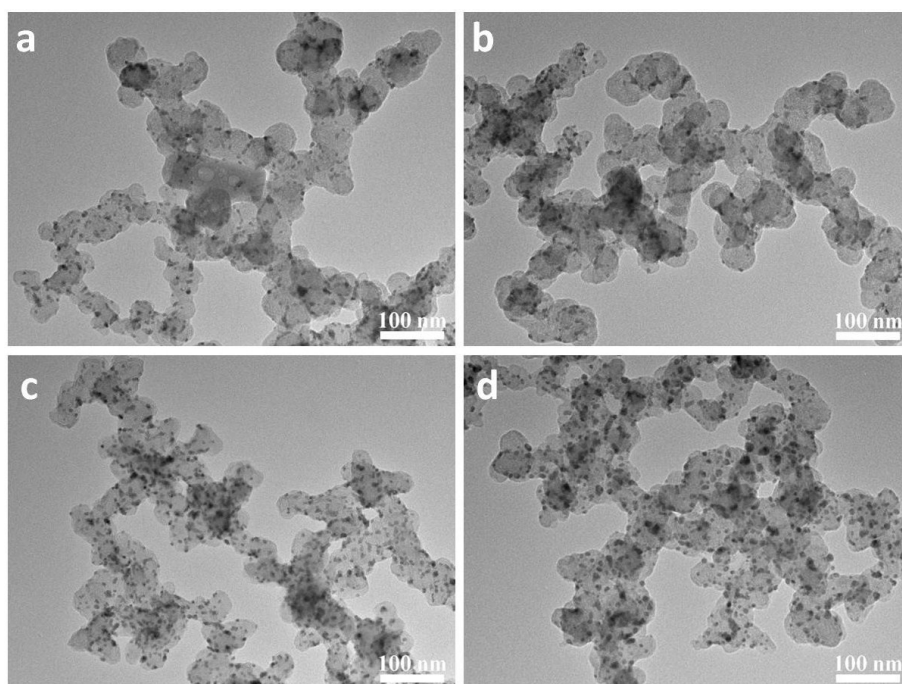

**Figure S5.** The representative TEM images of (a) Pd<sub>45</sub>Cu<sub>39</sub>Ru<sub>16</sub>/C-350, (b) Pd<sub>45</sub>Cu<sub>39</sub>Ru<sub>16</sub>/C-400, (c) Pd<sub>45</sub>Cu<sub>39</sub>Ru<sub>16</sub>/C-500 and (d) Pd<sub>45</sub>Cu<sub>39</sub>Ru<sub>16</sub>/C-500.

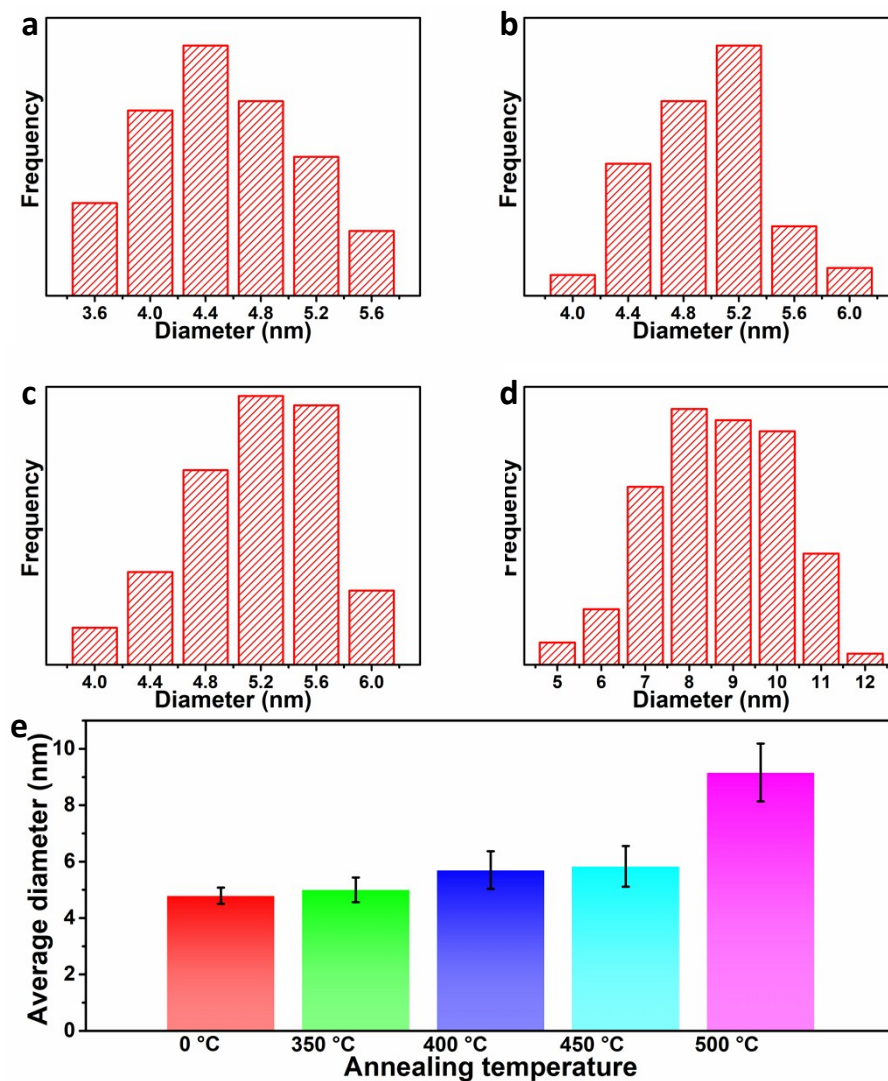

**Figure S6.** The size distributions of (a) Pd<sub>45</sub>Cu<sub>39</sub>Ru<sub>16</sub>/C-350, (b) Pd<sub>45</sub>Cu<sub>39</sub>Ru<sub>16</sub>/C-400, (c) Pd<sub>45</sub>Cu<sub>39</sub>Ru<sub>16</sub>/C-450 and (d) Pd<sub>45</sub>Cu<sub>39</sub>Ru<sub>16</sub>/C-500. (e) The average diameter of Pd<sub>45</sub>Cu<sub>39</sub>Ru<sub>16</sub>/C with different annealing temperature.

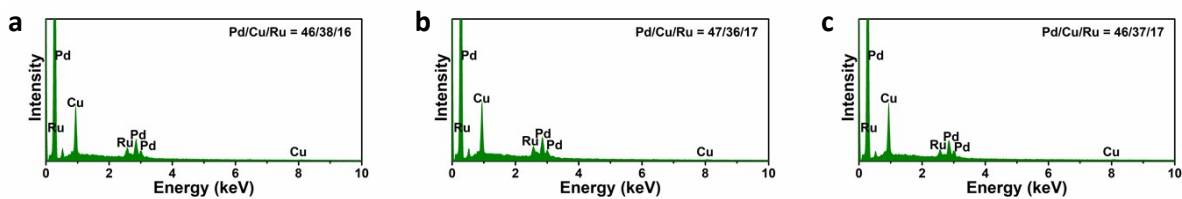

**Figure S7.** The SEM-EDS spectra of (a) Pd<sub>45</sub>Cu<sub>39</sub>Ru<sub>16</sub>/C-350, (b) Pd<sub>45</sub>Cu<sub>39</sub>Ru<sub>16</sub>/C-400, and (c) Pd<sub>45</sub>Cu<sub>39</sub>Ru<sub>16</sub>/C - 500.



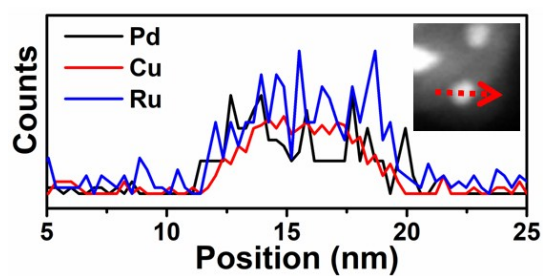

**Figure S8.** Elemental line-scan analysis across the red arrow in the *inset* of the single Pd<sub>45</sub>Cu<sub>39</sub>Ru<sub>16</sub> nanocrystal.

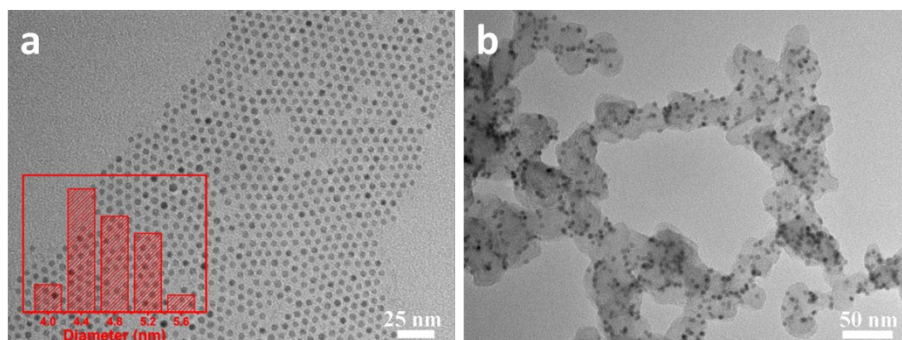

**Figure S9.** (a) The representative TEM image of Pd<sub>50</sub>Cu<sub>50</sub> nanocrystals (the *inset* is the corresponding size distribution). (b) The representative TEM image of Pd<sub>50</sub>Cu<sub>50</sub>/C.

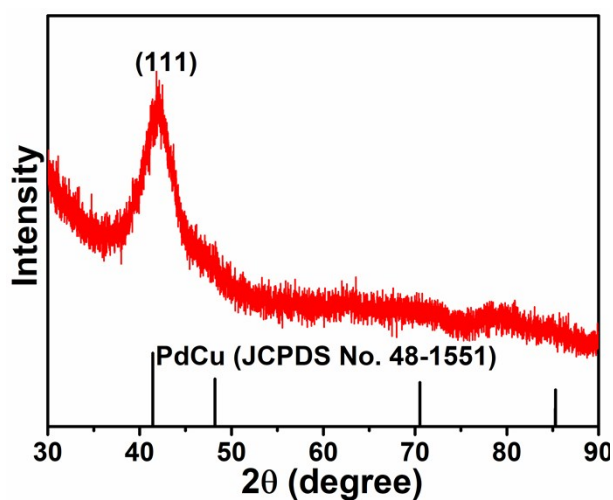

**Figure S10.** XRD pattern of Pd<sub>50</sub>Cu<sub>50</sub>/C.

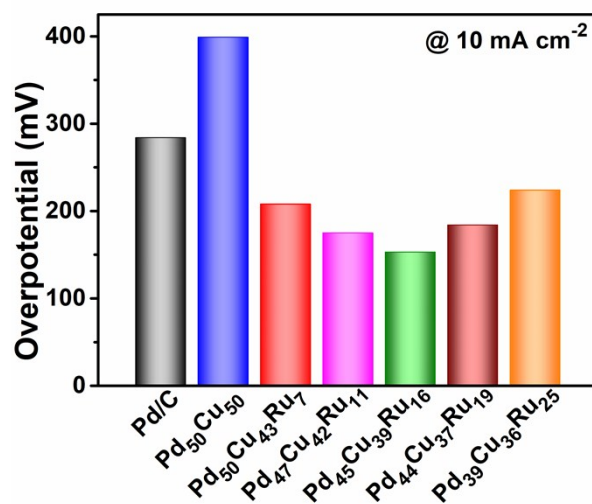

**Figure S11.** (a) Overpotentials at a current density of  $10 \text{ mA cm}^{-2}$ , and (b) Tafel slopes of PdCuRu/C with different compositions and the commercial Pd/C electrocatalysts.

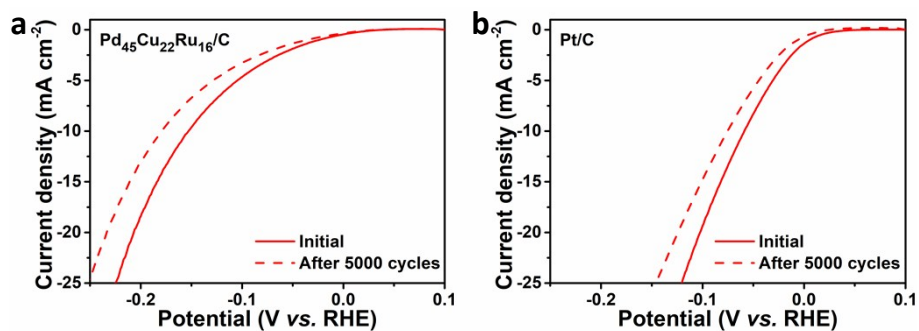

**Figure S12.** The polarization curves of (a) Pd<sub>45</sub>Cu<sub>39</sub>Ru<sub>16</sub>/C and (b) commercial Pt/C before and after 5000 potential cycles in 0.1 M KOH.

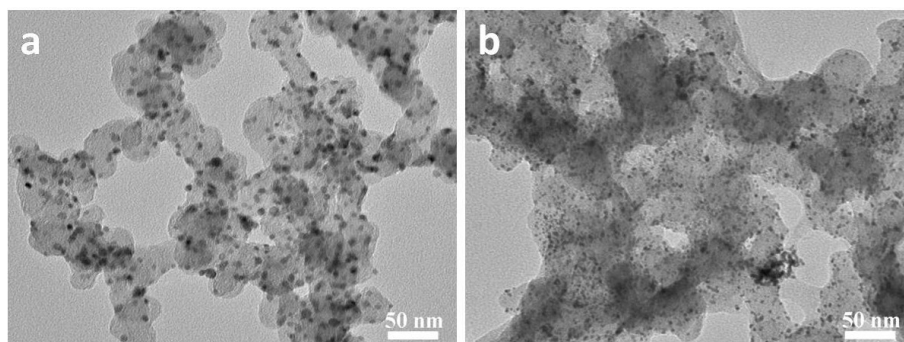

**Figure S13.** The representative TEM images of (a) Pd<sub>45</sub>Cu<sub>39</sub>Ru<sub>16</sub>/C and (b) commercial Pt/C after 5000 cycles.



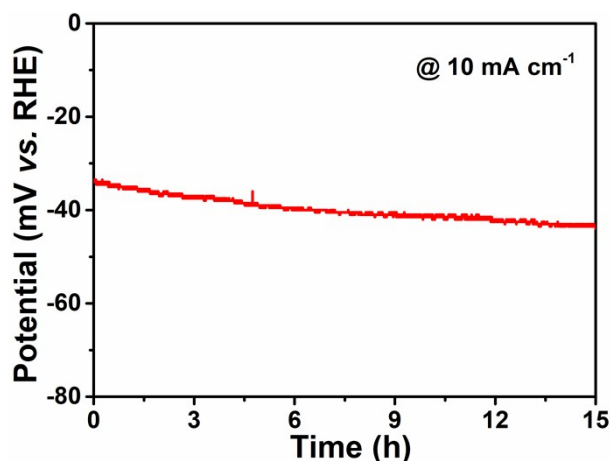

**Figure S14.** The chronopotentiometry measurement at a current density of  $10 \text{ mA cm}^{-2}$  of  $\text{Pd}_{45}\text{Cu}_{39}\text{Ru}_{16}/\text{C}-450$  in  $0.1 \text{ M KOH}$ .

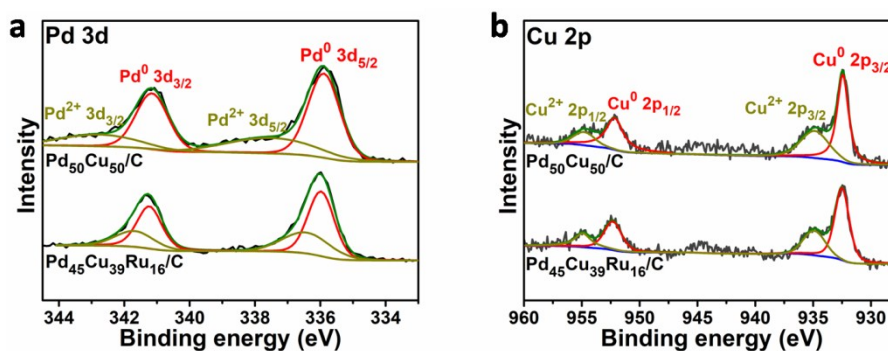

**Figure S15.** The XPS spectra and deconvoluted peaks of  $\text{Pd}_{50}\text{Cu}_{50}/\text{C}$  and  $\text{Pd}_{45}\text{Cu}_{39}\text{Ru}_{16}/\text{C}$  in regions of (a) Pd 3d and (b) Cu 2p.

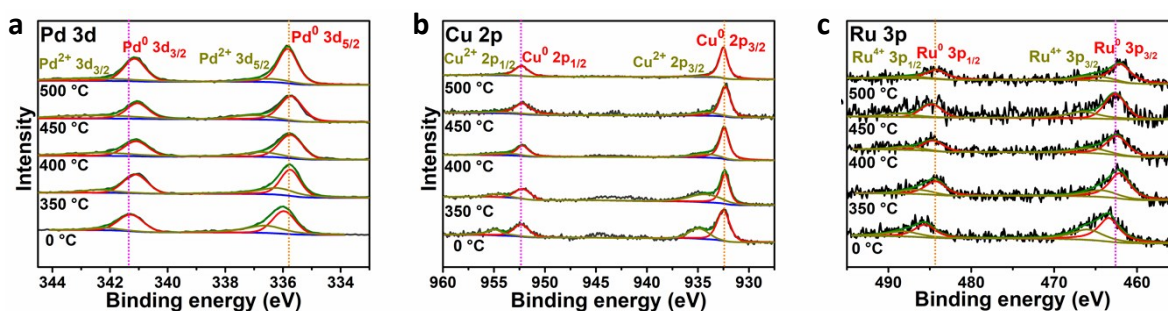

**Figure S16.** The XPS spectra and deconvoluted peaks of  $\text{Pd}_{45}\text{Cu}_{39}\text{Ru}_{16}/\text{C}$  with different annealing temperatures under  $\text{H}_2/\text{Ar}$  atmosphere in regions of (a) Pd 3d, (b) Cu 2p and (c) Ru 3p.

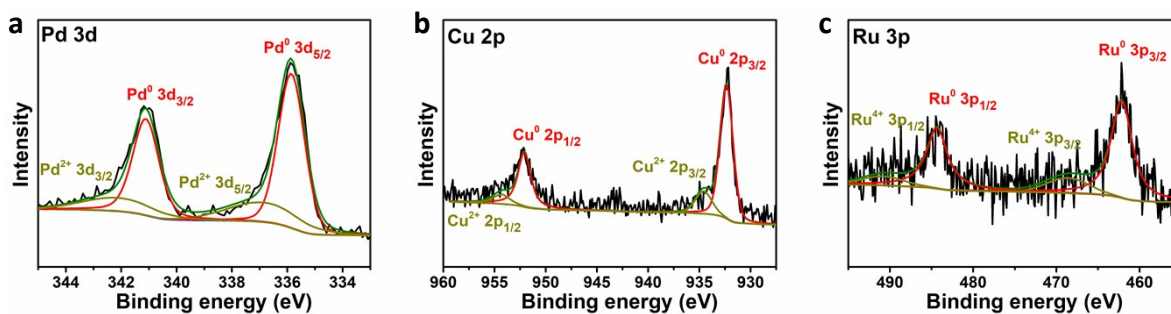

**Figure S17.** The XPS spectra and deconvoluted peaks of Pd<sub>45</sub>Cu<sub>39</sub>Ru<sub>16</sub>/C after HER durability test in regions of (a) Pd 3d, (b) Cu 2p and (c) Ru 3p.

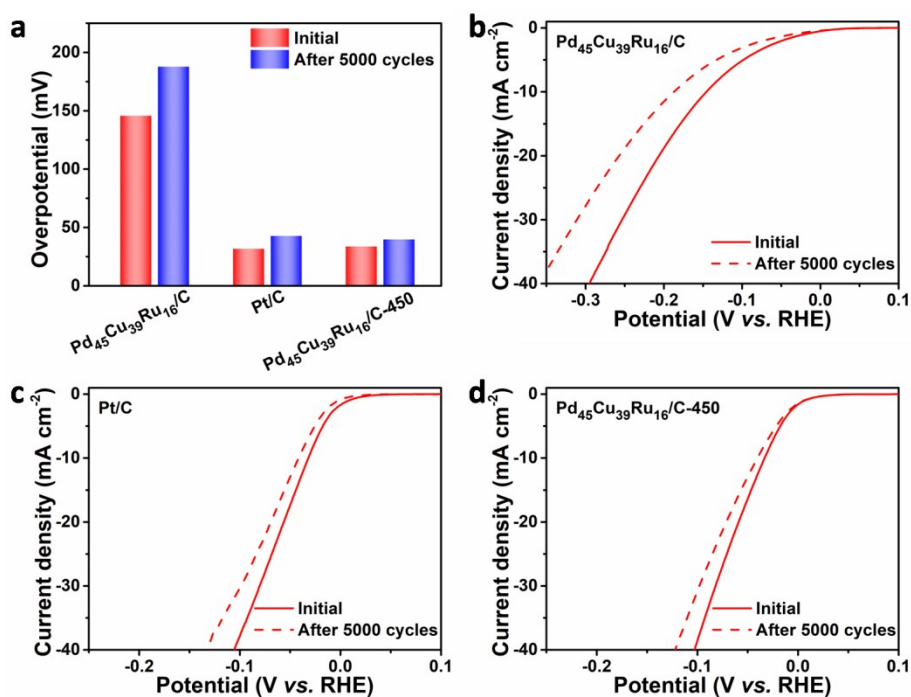

**Figure S18.** (a) The electrochemical stability of different catalysts after 5000 potential cycles in 0.5 M PBS. The polarization curves of (b) Pd<sub>45</sub>Cu<sub>39</sub>Ru<sub>16</sub>/C, (c) commercial Pt/C and (d) Pd<sub>45</sub>Cu<sub>39</sub>Ru<sub>16</sub>/C-450 before and after 5000 potential cycles in 0.5 M PBS.

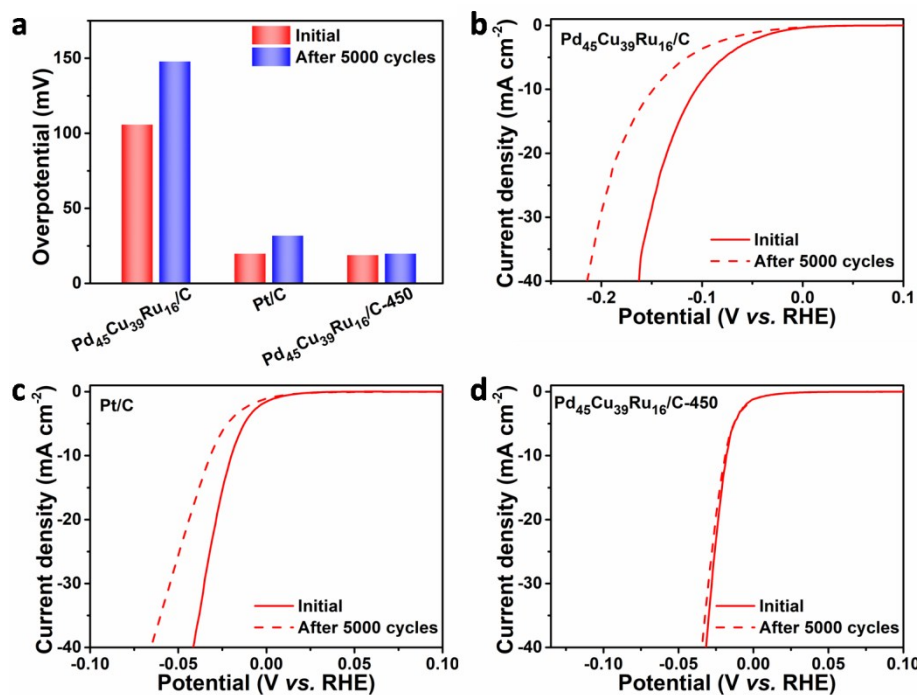

**Figure S19.** (a) The electrochemical stability of different catalysts after 5000 potential cycles in 0.1 M HClO<sub>4</sub>. The polarization curves of (b) Pd<sub>45</sub>Cu<sub>39</sub>Ru<sub>16</sub>/C, (c) commercial Pt/C and (d) Pd<sub>45</sub>Cu<sub>39</sub>Ru<sub>16</sub>/C-450 before and after 5000 potential cycles in 0.1 M HClO<sub>4</sub>.

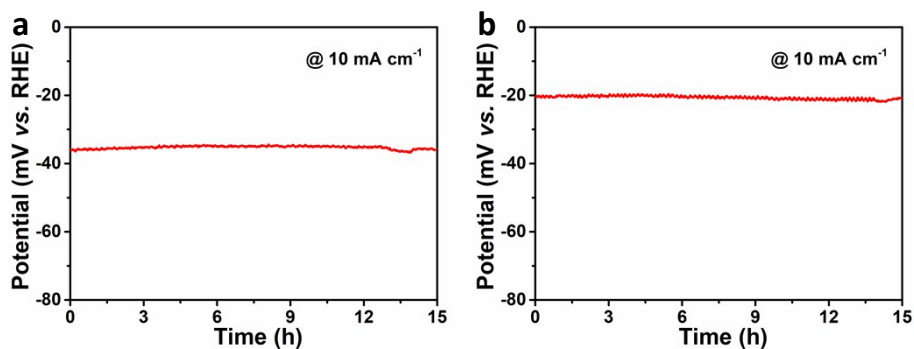

**Figure S20.** The chronopotentiometry measurements at a current density of 10 mA cm<sup>-2</sup> of Pd<sub>45</sub>Cu<sub>39</sub>Ru<sub>16</sub>/C-450 in (a) 0.5 M PBS and (b) 0.1 M HClO<sub>4</sub>.

**Table S1.** The composition percentage of different atomics of Pd<sub>45</sub>Cu<sub>39</sub>Ru<sub>16</sub>/C electrocatalysts treated with different annealing temperatures obtained from XPS and ICP-OES results.

| Catalysts                                                 | XPS (%) |      |      | ICP-OES (%) |      |      |
|-----------------------------------------------------------|---------|------|------|-------------|------|------|
|                                                           | Pd      | Cu   | Ru   | Pd          | Cu   | Ru   |
| Pd <sub>45</sub> Cu <sub>39</sub> Ru <sub>16</sub> /C     | 33.5    | 28.7 | 37.8 | 45.5        | 38.6 | 15.9 |
| Pd <sub>45</sub> Cu <sub>39</sub> Ru <sub>16</sub> /C-350 | 41.0    | 25.3 | 33.7 | 46.1        | 38.1 | 15.8 |
| Pd <sub>45</sub> Cu <sub>39</sub> Ru <sub>16</sub> /C-300 | 47.3    | 24.2 | 28.5 | 47.1        | 35.6 | 17.3 |
| Pd <sub>45</sub> Cu <sub>39</sub> Ru <sub>16</sub> /C-450 | 56.1    | 23.8 | 20.1 | 46.4        | 34.9 | 18.7 |
| Pd <sub>45</sub> Cu <sub>39</sub> Ru <sub>16</sub> /C-500 | 56.4    | 24.4 | 19.2 | 45.8        | 36.6 | 17.6 |

**Table S2.** Comparison of HER catalytic performance in alkaline/neutral/acid media for Pd<sub>45</sub>Cu<sub>39</sub>Ru<sub>16</sub>/C-450 with other reported HER electrocatalysts.

| Catalysts                                                 | Overpotential@ <i>j</i><br>(mV@10 mA cm <sup>-2</sup> ) | Tafel slopes<br>(mV dec <sup>-1</sup> ) | Electrolytes                         | References |
|-----------------------------------------------------------|---------------------------------------------------------|-----------------------------------------|--------------------------------------|------------|
|                                                           | 31                                                      | 52                                      | 0.1 M KOH                            |            |
| Pd <sub>45</sub> Cu <sub>39</sub> Ru <sub>16</sub> /C-450 | 34                                                      | 39                                      | 0.5 M PBS                            | This work  |
|                                                           | 19                                                      | 22                                      | 0.1 M HClO <sub>4</sub>              |            |
| PdCu nanosheets                                           | 106                                                     | 123                                     | 1.0 M KOH                            | [1]        |
| PdCu nanoparticles                                        | 75                                                      | 48                                      | 0.1 M H <sub>2</sub> SO <sub>4</sub> | [2]        |
| PdCu@Pd nanocubes                                         | 68                                                      | 35                                      | 0.5 M H <sub>2</sub> SO <sub>4</sub> | [3]        |
| Pd/Cu-Pt nanorings                                        | 22.8                                                    | 25                                      | 0.5 M H <sub>2</sub> SO <sub>4</sub> | [4]        |
| PdCu <sub>3</sub> nanoparticles                           | 50                                                      | 34                                      | 0.5 M H <sub>2</sub> SO <sub>4</sub> | [5]        |
| PdNiMo film                                               | 110                                                     | 227                                     | 1.0 M NaOH                           | [6]        |
|                                                           | 97                                                      | 90                                      | 1.0 M KOH                            |            |
| PdTe nanowires                                            | 48                                                      | 63                                      | 0.5 M H <sub>2</sub> SO <sub>4</sub> | [7]        |

---

|                                     |      |      |                                      |      |
|-------------------------------------|------|------|--------------------------------------|------|
| Pd <sub>17</sub> Se films           | 182  | 57   |                                      |      |
| Pd <sub>7</sub> Se films            | 162  | 56   | 0.5 M H <sub>2</sub> SO <sub>4</sub> | [8]  |
| Pd <sub>4</sub> Se films            | 94   | 50   |                                      |      |
| Pd nanoparticles/CN <sub>x</sub>    | 55   | 35   | 0.5 M H <sub>2</sub> SO <sub>4</sub> | [9]  |
| PdCo alloy                          | 80   | 31   | 0.5 M H <sub>2</sub> SO <sub>4</sub> | [10] |
|                                     | 250  | NA   | 1.0 M KOH                            |      |
| PdMnCo alloy                        | 39   | 31   | 0.5 M H <sub>2</sub> SO <sub>4</sub> | [11] |
| Pt <sub>2</sub> Pd/NPG              | 58   | 31   | 0.5 M H <sub>2</sub> SO <sub>4</sub> | [12] |
| Pt@Pd nanoflowers                   | 56   | 39   | 0.5 M H <sub>2</sub> SO <sub>4</sub> | [13] |
| Ru/C <sub>3</sub> N <sub>4</sub> /C | 79   | 69   | 0.1 M KOH                            | [14] |
| Ru nanodendrites                    | 43.4 | 49   | 1.0 M KOH                            | [15] |
|                                     | 39.3 | 25   | 0.1 M KOH                            |      |
| RuNi nanoplates                     | 40   | 23.4 | 1.0 M KOH                            | [16] |
|                                     | 32   | 53   | 1.0 M KOH                            |      |
| Ru@CN                               | 100  | NA   | 1.0 M PBS                            | [17] |
|                                     | 126  | NA   | 0.5 M H <sub>2</sub> SO <sub>4</sub> |      |
| Ru <sub>2</sub> P nanoparticles     | 52   | 69   | 1.0 M KOH                            | [18] |
|                                     | 57   | 87   | 1.0 M PBS                            |      |
| Ru@NiCoP                            | 38   | 38   | 0.5 M H <sub>2</sub> SO <sub>4</sub> | [19] |
|                                     | 52   | 50   | 1.0 M KOH                            |      |
| Thick hollow                        | 49   | 49   | 0.5 M H <sub>2</sub> SO <sub>4</sub> | [20] |
|                                     | 82   | 48   | 1.0 M KOH                            |      |

---

|                            |      |      |                                      |      |
|----------------------------|------|------|--------------------------------------|------|
| Cu <sub>2-x</sub> S@Ru NPs | 129  | 51   | 0.5 M H <sub>2</sub> SO <sub>4</sub> |      |
| Ru/GLC                     | 35   | 46   | 0.5 M H <sub>2</sub> SO <sub>4</sub> | [21] |
| PtRu nanoclusters          | 21.6 | 27.2 | 0.5 M H <sub>2</sub> SO <sub>4</sub> | [22] |

NA: Not available

**Table S3.** The valence state ratios of Pd<sup>0</sup>/Pd<sup>2+</sup>, Cu<sup>0</sup>/Cu<sup>2+</sup>, and Ru<sup>0</sup>/Ru<sup>4+</sup> obtained from XPS spectra of Pd<sub>45</sub>Cu<sub>39</sub>Ru<sub>16</sub>/C electrocatalysts treated with different annealing temperatures.

| Catalysts                                                                   | Pd <sup>0</sup> /Pd <sup>2+</sup> | Cu <sup>0</sup> /Cu <sup>2+</sup> | Ru <sup>0</sup> /Ru <sup>4+</sup> |
|-----------------------------------------------------------------------------|-----------------------------------|-----------------------------------|-----------------------------------|
| Pd <sub>45</sub> Cu <sub>39</sub> Ru <sub>16</sub> /C                       | 1.81                              | 2.11                              | 1.58                              |
| Pd <sub>45</sub> Cu <sub>39</sub> Ru <sub>16</sub> /C-350                   | 2.08                              | 2.30                              | 2.59                              |
| Pd <sub>45</sub> Cu <sub>39</sub> Ru <sub>16</sub> /C-300                   | 2.12                              | 3.29                              | 2.74                              |
| Pd <sub>45</sub> Cu <sub>39</sub> Ru <sub>16</sub> /C-450                   | 2.33                              | 3.47                              | 3.16                              |
| Pd <sub>45</sub> Cu <sub>39</sub> Ru <sub>16</sub> /C-500                   | 2.77                              | 17.40                             | 3.67                              |
| Pd <sub>45</sub> Cu <sub>39</sub> Ru <sub>16</sub> /C-450 (After HER tests) | 3.03                              | 4.72                              | 4.49                              |

**Table S4.** Summary of binding energies of Pd<sub>45</sub>Cu<sub>39</sub>Ru<sub>16</sub>/C electrocatalysts treated with different annealing temperatures from XPS results, including Pd<sup>0</sup> 3d<sub>5/2</sub>, Cu<sup>0</sup> 2p<sub>3/2</sub> and Ru<sup>0</sup> 3p<sub>3/2</sub> states.

| Catalysts                                                                        | Pd <sup>0</sup> 3d <sub>5/2</sub> | Cu <sup>0</sup> 2p <sub>3/2</sub> | Ru <sup>0</sup> 3p <sub>3/2</sub> |
|----------------------------------------------------------------------------------|-----------------------------------|-----------------------------------|-----------------------------------|
| Pd <sub>45</sub> Cu <sub>39</sub> Ru <sub>16</sub> /C (eV)                       | 335.97                            | 932.54                            | 463.38                            |
| Pd <sub>45</sub> Cu <sub>39</sub> Ru <sub>16</sub> /C-350 (eV)                   | 335.81                            | 932.39                            | 462.09                            |
| Pd <sub>45</sub> Cu <sub>39</sub> Ru <sub>16</sub> /C-400 (eV)                   | 335.78                            | 932.42                            | 462.38                            |
| Pd <sub>45</sub> Cu <sub>39</sub> Ru <sub>16</sub> /C-450 (eV)                   | 335.75                            | 932.37                            | 462.63                            |
| Pd <sub>45</sub> Cu <sub>39</sub> Ru <sub>16</sub> /C-500 (eV)                   | 335.84                            | 932.52                            | 461.98                            |
| Pd <sub>45</sub> Cu <sub>39</sub> Ru <sub>16</sub> /C-450 (After HER tests) (eV) | 335.84                            | 932.34                            | 462.15                            |



## References

- 1 X. Zhao, L. Dai, Q. Qin, F. Pei, C. Hu and N. Zheng, *Small*, 2017, **13**, 1602970.
- 2 X. Zhang, D. Wu and D. Cheng, *Electrochim. Acta*, 2017, **246**, 572-579.
- 3 J. Li, F. Li, S. X. Guo, J. Zhang and J. Ma, *ACS Appl. Mater. Interfaces*, 2017, **9**, 8151-8160.
- 4 T. Chao, X. Luo, W. Chen, B. Jiang, J. Ge, Y. Lin, G. Wu, X. Wang, Y. Hu, Z. Zhuang, Y. Wu, X. Hong and Y. Li, *Angew. Chem. Int. Ed.*, 2017, **56**, 16047-16051.
- 5 R. Jana, A. Bhim, P. Bothra, S. K. Pati and S. C. Peter, *ChemSusChem*, 2016, **9**, 2922-2927.
- 6 J. Tang, X. Zhao, Y. Zuo, P. Ju and Y. Tang, *Electrochim. Acta*, 2015, **174**, 1041-1049.
- 7 L. Jiao, F. Li, X. Li, R. Ren, J. Li, X. Zhou, J. Jin and R. Li, *Nanoscale*, 2015, **7**, 18441-18445.
- 8 S. Kukunuri, P. M. Austeria and S. Sampath, *Chem. Commun.*, 2016, **52**, 206-209.
- 9 T. Bhowmik, M. K. Kundu and S. Barman, *ACS Catal.*, 2016, **6**, 1929-1941.
- 10 J. Chen, G. Xia, P. Jiang, Y. Yang, R. Li, R. Shi, J. Su and Q. Chen, *ACS Appl. Mater. Interfaces*, 2016, **8**, 13378-13383.
- 11 R. Zhang, Z. Sun, R. Feng, Z. Lin, H. Liu, M. Li, Y. Yang, R. Shi, W. Zhang and Q. Chen, *ACS Appl. Mater. Interfaces*, 2017, **9**, 38419-38427.
- 12 X. Zhong, Y. Qin, X. Chen, W. Xu, G. Zhuang, X. Li and J. Wang, *Carbon*, 2017, **114**, 740-748.
- 13 X. X. Lin, A. J. Wang, K. M. Fang, J. Yuan and J. J. Feng, *ACS Sustainable Chem. Eng.*, 2017, **5**, 8675-8683.
- 14 Y. Zheng, Y. Jiao, Y. Zhu, L. H. Li, Y. Han, Y. Chen, M. Jaroniec and S. Z. Qiao, *J. Am. Chem. Soc.*, 2016, **138**, 16174-16181.
- 15 K. Gao, Y. Wang, Z. Wang, Z. Zhu, J. Wang, Z. Luo, C. Zhang, X. Huang, H. Zhang and W. Huang, *Chem. Commun.*, 2018, **54**, 4613-4616.
- 16 J. Ding, Q. Shao, Y. Feng and X. Huang, *Nano Energy*, 2018, **47**, 1-7.
- 17 J. Wang, Z. Wei, S. Mao, H. Li and Y. Wang, *Energy Environ. Sci.*, 2018, **11**, 800-806.
- 18 Z. Pu, I. S. Amiinu, Z. Kou, W. Li and S. Mu, *Angew. Chem. Int. Ed.*, 2017, **56**, 11559-11564.
- 19 S. Liu, Q. Liu, Y. Lv, B. Chen, Q. Zhou, L. Wang, Q. Zheng, C. Che and C. Chen, *Chem. Commun.*, 2017, **53**, 13153-13156.
- 20 D. Yoon, J. Lee, B. Seo, B. Kim, H. Baik, S. H. Joo and K. Lee, *Small*, 2017, **13**, 1700052.
- 21 Z. Chen, J. Lu, Y. Ai, Y. Ji, T. Adschiri and L. Wan, *ACS Appl. Mater. Interfaces*, 2016, **8**, 35132-35137.
- 22 K. Li, Y. Li, Y. Wang, J. Ge, C. Liu and W. Xing, *Energy Environ. Sci.*, 2018, **11**, 1232-1239.
